# Supplementary material for: B38: an all-boron fullerene analogue
Source: Royal Society of Chemistry journal article supplement (doi:10.1039/c4nr01846j), 2014-01-01
Supplement: c4nr01846j1.pdf [file c4nr01846j1.pdf]

# Electronic Supplementary Information

## B<sub>38</sub>: An All-boron Fullerene Analogue

Jian Lv,<sup>ab</sup> Yanchao Wang,<sup>a</sup> Li Zhu<sup>a</sup> and Yanming Ma<sup>\*ab</sup>

<sup>a</sup> *State Key Laboratory of Superhard Materials, Jilin University, Changchun 130012, China*

<sup>b</sup> *Beijing Computational Science Research Center, Beijing 100084, China*

**Table SI.** Optimized atomic coordinates for the B<sub>38</sub> fullerene analogue.

| Atom | X (Å)   | Y (Å)   | Z (Å)   | Atom | X (Å)   | Y (Å)   | Z (Å)   |
|------|---------|---------|---------|------|---------|---------|---------|
| B    | -0.3723 | -2.5176 | 1.2068  | B    | 3.1618  | -0.4495 | 0.0895  |
| B    | -1.1245 | 2.5210  | -0.3462 | B    | 0.2119  | 1.9134  | 2.0397  |
| B    | 1.7538  | 1.5103  | -1.6050 | B    | -2.1654 | 1.3800  | -1.0710 |
| B    | 0.0476  | -0.3602 | -2.7931 | B    | -2.4214 | 0.0643  | 1.3784  |
| B    | 1.1285  | -2.6786 | -1.3263 | B    | 0.3723  | 2.5176  | -1.2068 |
| B    | 1.1245  | -2.5210 | 0.3462  | B    | -3.1618 | 0.4495  | -0.0895 |
| B    | -1.0489 | 2.2046  | -1.9648 | B    | 2.2748  | -1.6585 | -0.6557 |
| B    | 0.3706  | 2.7291  | 0.5264  | B    | -1.7539 | -1.5104 | 1.6051  |
| B    | -1.3806 | 1.2053  | 2.0931  | B    | -2.5641 | -1.1298 | 0.1058  |
| B    | 1.4462  | 0.9743  | 2.5527  | B    | 1.5397  | 0.3173  | -2.7110 |
| B    | 2.4214  | -0.0643 | -1.3684 | B    | -0.2185 | -1.9134 | -2.0386 |
| B    | -1.4462 | -0.9743 | -2.5528 | B    | -1.5397 | -0.3173 | 2.7110  |
| B    | -1.1285 | 2.6786  | 1.3263  | B    | -0.3706 | -2.7291 | -0.5265 |
| B    | -1.7487 | -2.5282 | 0.3282  | B    | -2.2748 | 1.6585  | 0.6557  |
| B    | 2.4053  | 0.3142  | 1.4064  | B    | 1.3806  | -1.2053 | -2.0931 |
| B    | 2.1654  | -1.3800 | 1.0710  | B    | -1.3339 | 0.6471  | -2.3949 |
| B    | 1.7487  | 2.5282  | -0.3282 | B    | -0.0476 | 0.3602  | 2.7931  |
| B    | -2.4153 | -0.3142 | -1.4064 | B    | 2.5641  | 1.1298  | -0.1058 |
| B    | 1.3339  | -0.6471 | 2.4064  | B    | 1.0489  | -2.2046 | 1.9648  |

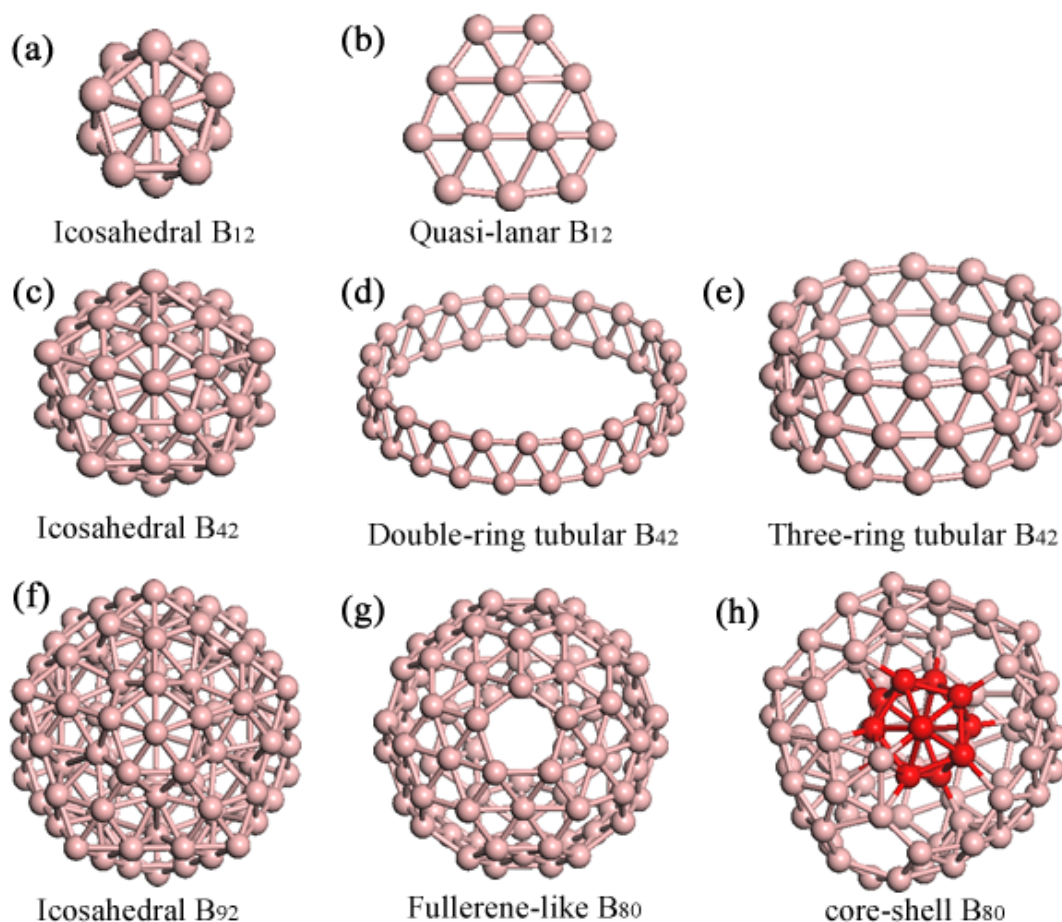

**Fig. S1 Stabilities of the icosahedral motifs in B clusters.** Mackay icosahedral clusters dependent on the sizes can be represented by 12, 42 and 92 atoms, respectively. The icosahedral B<sub>12</sub> (a) is already known in bulk materials, but in free-standing clusters it is metastable when compared to the quasi-planar cluster (b)<sup>1</sup>. For B<sub>42</sub> icosahedral cluster (c), it is energetically less stable than the DRT (d) and TRT structures (e) by about 2.71 and 5.46 eV at PBE0/6-311G\* level of theory, respectively. The B<sub>80</sub> fullerene (g) can be seen as the icosahedral-type structure by removal of 12 vertices atoms of icosahedral B<sub>92</sub> (f). However, this structure is less stable than the core-shell structure (h)<sup>2</sup>. Therefore, known studies did not establish the phase stabilities of icosahedral structural motifs in free-standing B clusters. They are overwhelmed by the planar, tubular (DRT and TRT) and core-shell structures in different size ranges.

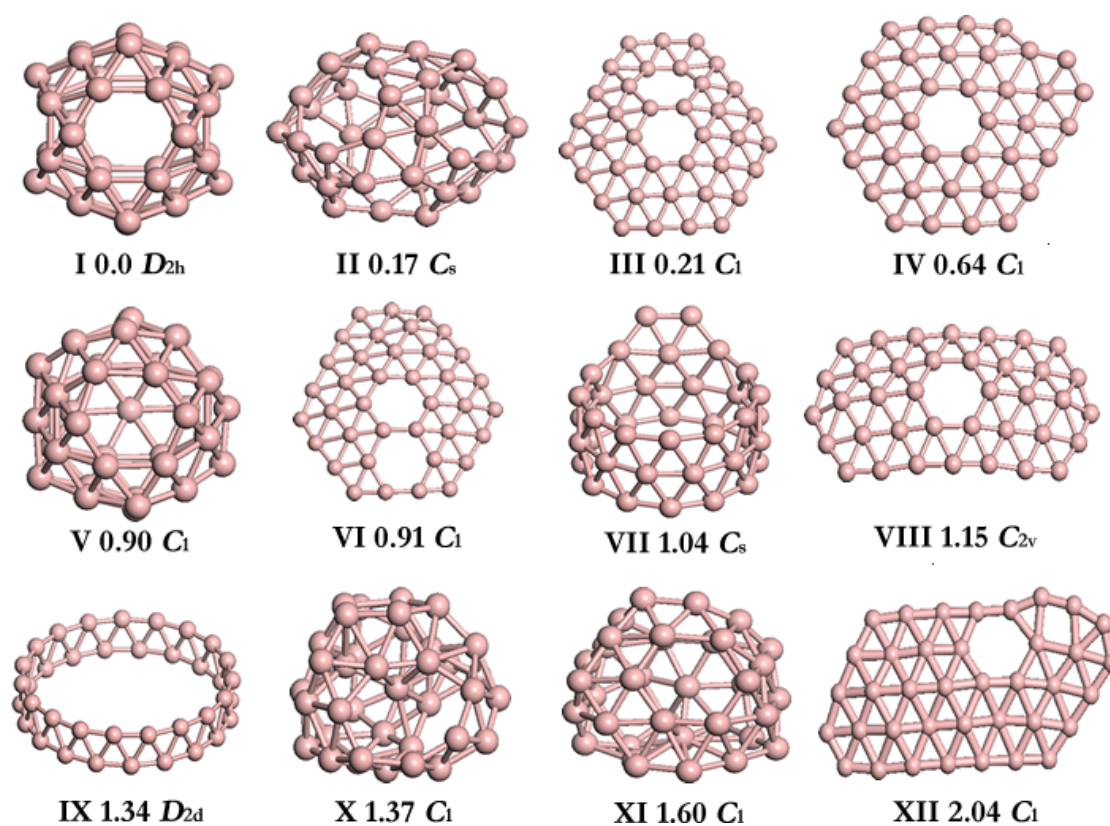

**Fig. S2** Structures of low-lying isomers of  $B_{38}$ . Bottom labels are point-group symmetries and relative energies to the ground state at PBE0/6-311G\* level of theory, zero-point energy corrections were included for all isomers at the same level of theory.

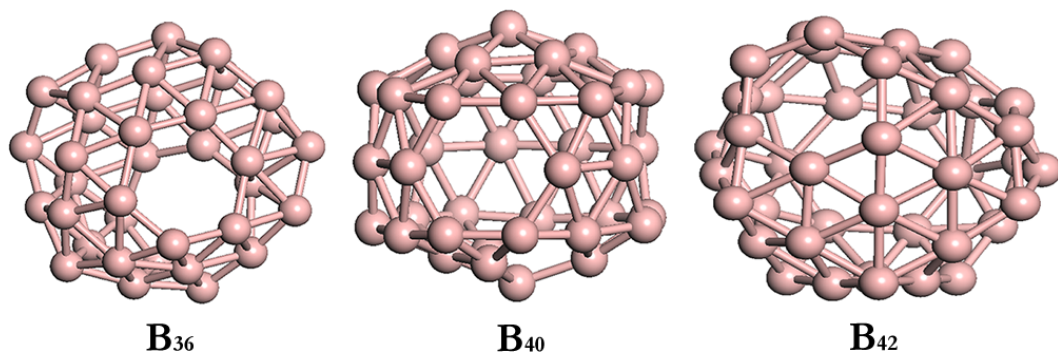

**Fig. S3** Lowest-energy cage structures of  $B_{36}$ ,  $B_{40}$  and  $B_{42}$  clusters derived from constrained structure searches.

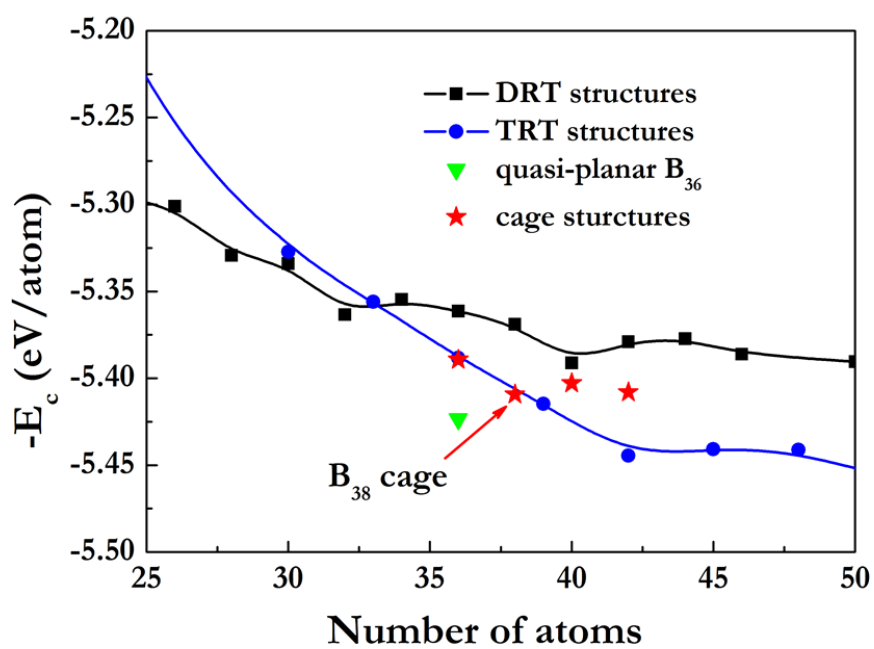

**Fig. S4** Cohesive energies ( $E_c$ ) of representative structures as a function of the number of atoms.

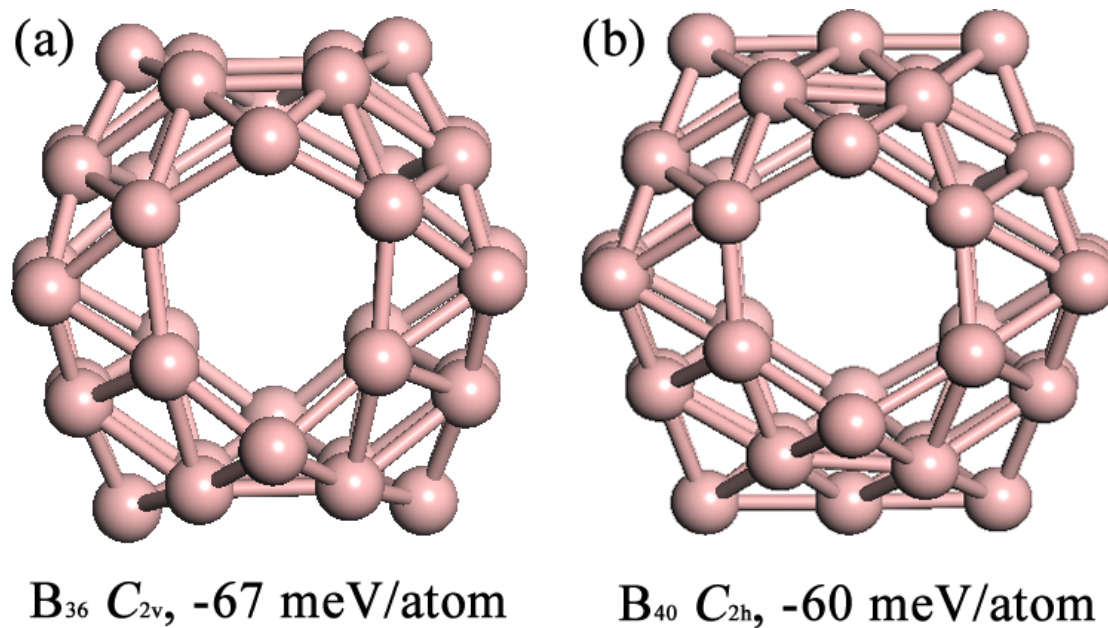

**Fig. S5** (a) Model structure of  $B_{36}$  cage derived by removing two centered B atoms out of two filled hexagons in  $B_{38}$  fullerene analogue, and (b) model structure of  $B_{40}$  cage derived by adding two B atoms to each center of the two opposite open hexagons of the  $B_{38}$  fullerene analogue. Labels are point-group symmetries and relative cohesive energies to that of the  $B_{38}$  fullerene analogue.



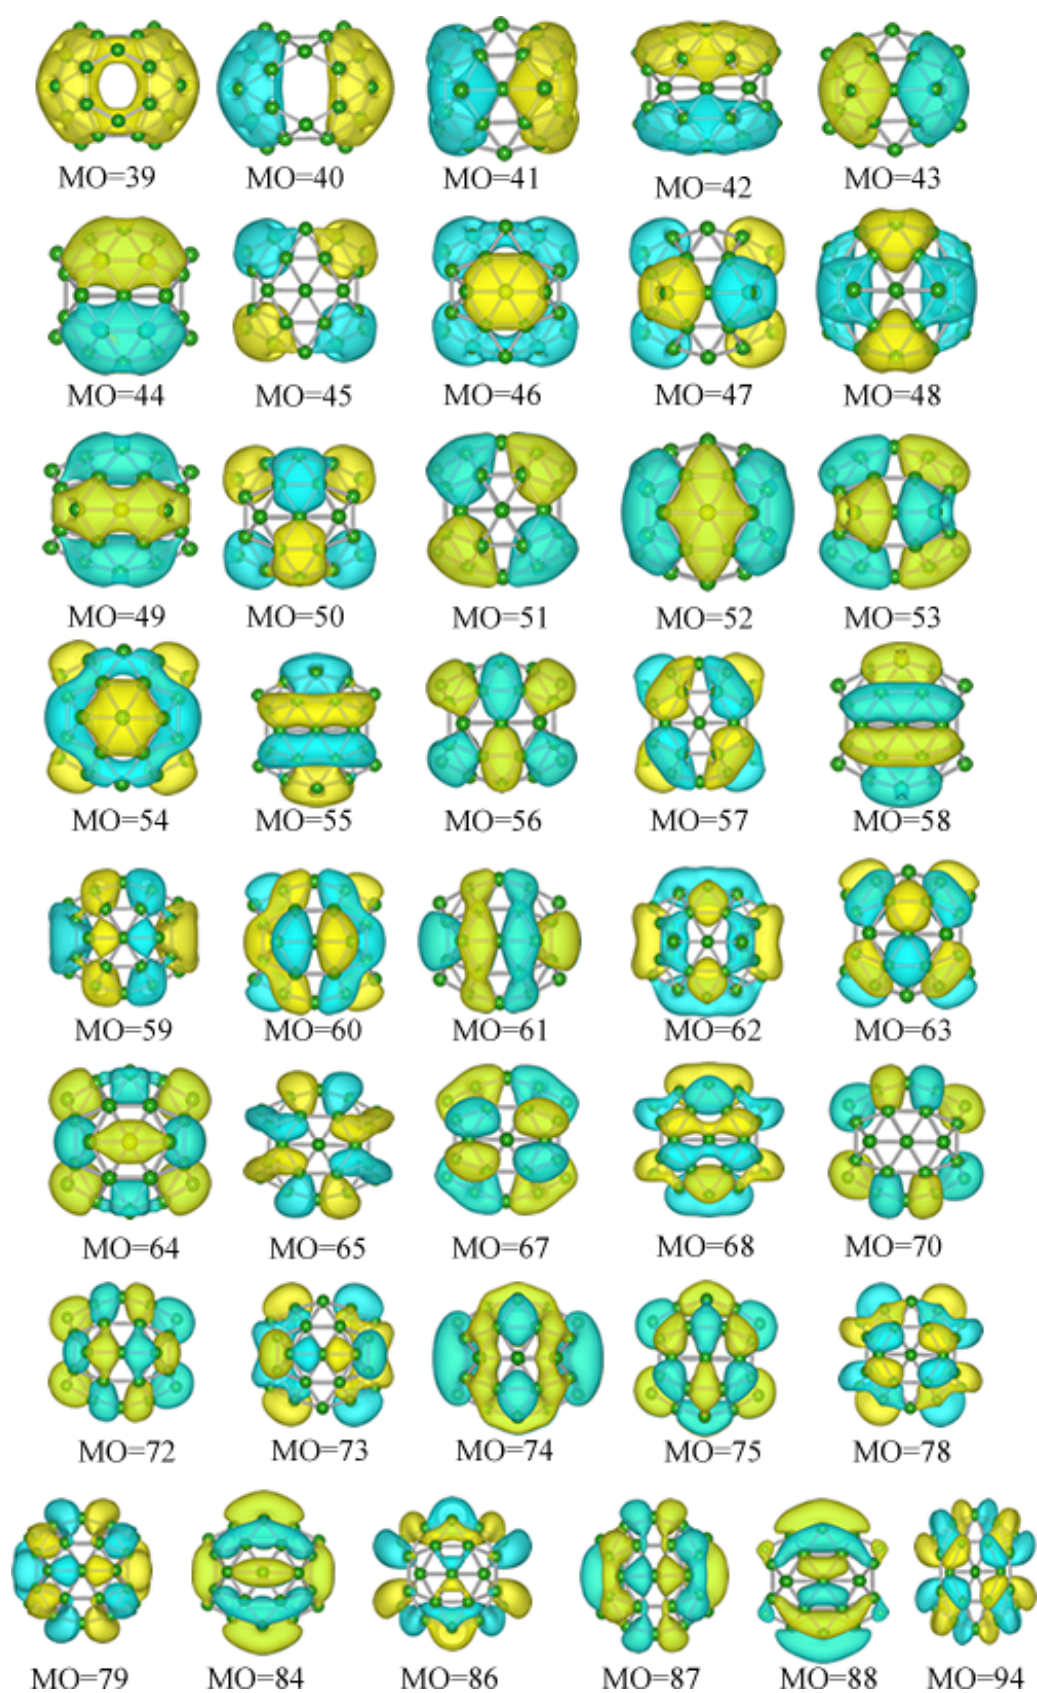

**Fig. S6** The 41  $\sigma$ - canonical molecular orbitals of the  $B_{38}$  fullerene analogue.

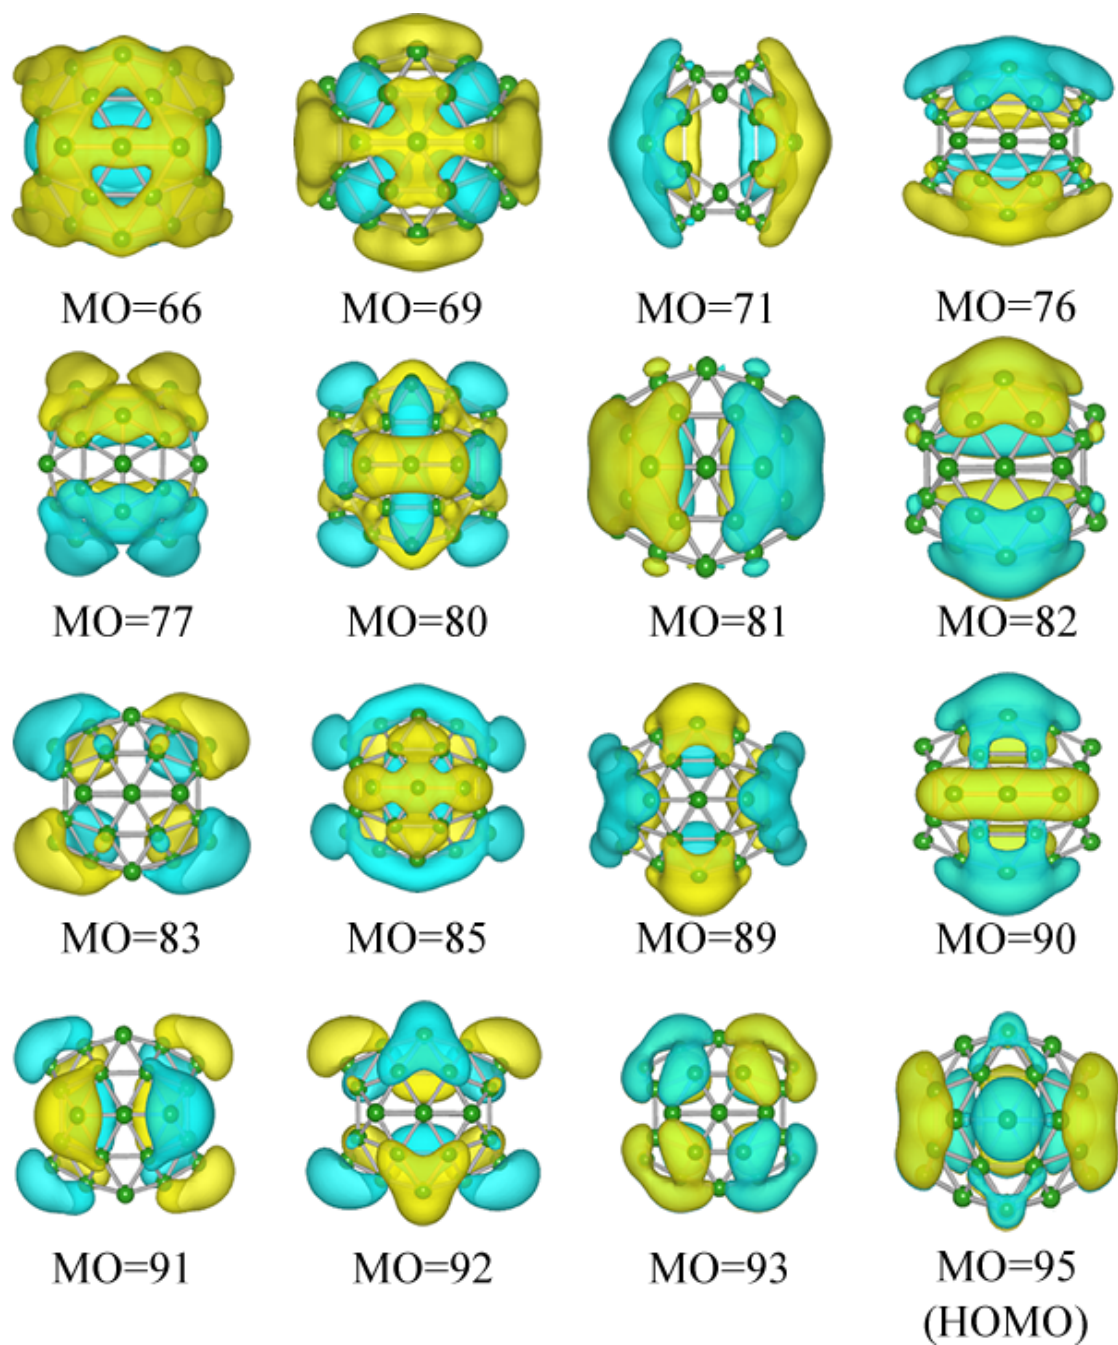

**Fig. S7** The 16  $\pi$ - canonical molecular orbitals of the B<sub>38</sub> fullerene analogue.

## References

- 1 H.-J. Zhai, B. Kiran, J. Li, and L.-S. Wang, *Nat. Mater.*, 2003, **2**, 827-833.
- 2 F. Li, P. Jin, D.-e. Jiang, L. Wang, S. B. Zhang, J. Zhao, and Z. Chen, *J. Chem. Phys.*, 2012, **136**, 074302-074309.
